# Supplementary material for: Molecular identification of spiders preying on Empoasca vitis in a tea plantation
Source: PubMed Central journal article supplement (PMC5552770; doi:10.1038/s41598-017-07668-w), 2017-08-10
Supplement: 41598_2017_7668_MOESM1_ESM.pdf [file 41598_2017_7668_MOESM1_ESM.pdf]

# **Molecular identification of spiders preying on *Empoasca vitis* in a tea plantation**

Ting-bang Yang<sup>1,+</sup>, Jie Liu<sup>1,+</sup>, Long-yu Yuan<sup>1</sup>, Yang Zhang<sup>1</sup>, Dai-qin Li<sup>3</sup>, Ingi Agnarsson<sup>2,\*</sup>  
& Jian Chen<sup>1,\*</sup>

<sup>1</sup>Centre for Behavioural Ecology and Evolution (CBEE), and Hubei Collaborative Innovation Center for Green Transformation of Bio-Resources, College of Life Sciences, Hubei University, Wuhan, 430062, China

<sup>2</sup>Department of Biology, University of Vermont, Burlington, VT, USA

<sup>3</sup>Department of Biological Sciences, National University of Singapore, Singapore

\*Corresponding. Jian Chen, E-mail: chen.jian\_hb@foxmail.com and Ingi Agnarsson, E-mail: iagnarsson@gmail.com.

+These authors contributed equally to this work.

## Supporting information

Additional supporting information may be found in the online version of this article:

**Table S1. Statistic of the spider species in the canopies of tea.**

**Table S2. Population dynamics of *E. vitis* and four dominant spider species in the canopies of tea.** Values presented as mean  $\pm$  SD (N = 3).

**Table S3. Effect of background DNA of predators on detection of *E. vitis*.** Values presented as mean  $\pm$  SD. CV stands for coefficients of variation. Exp1, the genomic DNA dissolved in ultra-pure water; Exp2, the genomic DNA dissolved in the genomic DNA mixture of four dominant spider species.

**Figure S1. A RQ-PCR standard curve for using stock plasmids of *E. vitis*.** *Ct* stands for RQ-PCR cycle number where fluorescence curve crosses threshold line. Each concentration was used in triplicates. The curve was linear over the range of concentrations used ( $1.92 \times 10^2$ – $1.92 \times 10^6$  copies/ $\mu$ L). The amplification efficiency was 97.6%.

**Figure S2. Agarose gel electrophoresis of PCR amplified DNA of field-collected individual spiders with various dilution.** Cropped gels are merged and displayed (the full-length of each uncropped gel is 11.5 cm). a: Non-diluted DNA sample; b: Diluted by 3-fold with elution buffer; c: Diluted by 6-fold with elution buffer; d: Diluted by 9-fold with elution buffer. Lanes 1: DNA marker; Lanes 2–16: adult *E. albaria* from field collection.

**Table S1. Statistic of the spider species in the canopies of tea.**

|  | Family                         | Species                         | Field-collected number (adult) | Dominance (%) |     |
|--|--------------------------------|---------------------------------|--------------------------------|---------------|-----|
|  | Salticidae                     | <i>Evarcha albaria</i>          | 382                            | 43.2          |     |
|  |                                | <i>Phintella bifurcilinea</i>   | 23                             | 2.6           |     |
|  |                                | <i>Phintella melloteei</i>      | 17                             | 1.9           |     |
|  |                                | <i>Plexippus setipes</i>        | 16                             | 1.8           |     |
|  |                                | <i>Phintella yinae</i>          | 3                              | 0.3           |     |
|  |                                | <i>Bianor hotingchiehi</i>      | 1                              | 0.1           |     |
|  |                                | <i>Carrhotus xanthogramma</i>   | 1                              | 0.1           |     |
|  |                                | <i>Phintella debilis</i>        | 1                              | 0.1           |     |
|  |                                | Theridiidae                     | <i>Meotipa pulcherrima</i>     | 75            | 8.5 |
|  | <i>Coleosoma octomaculatum</i> |                                 | 74                             | 8.4           |     |
|  | <i>Theridion mirabilis</i>     |                                 | 20                             | 2.3           |     |
|  | <i>Phycosoma stictum</i>       |                                 | 3                              | 0.3           |     |
|  | <i>Phycosoma amamiense</i>     |                                 | 2                              | 0.2           |     |
|  | <i>Euryopis galeiforma</i>     |                                 | 2                              | 0.2           |     |
|  | <i>Theridula gonygaster</i>    |                                 | 2                              | 0.2           |     |
|  | <i>Takayus lushanensis</i>     |                                 | 2                              | 0.2           |     |
|  | <i>Meotipa vesiculosa</i>      |                                 | 1                              | 0.1           |     |
|  | Araneidae                      |                                 | <i>Araneus ejusmodi</i>        | 25            | 2.8 |
|  |                                |                                 | <i>Neoscona melloteei</i>      | 22            | 2.5 |
|  |                                | <i>Neoscona adianta</i>         | 6                              | 0.7           |     |
|  |                                | <i>Cyclosa atrata</i>           | 1                              | 0.1           |     |
|  |                                | <i>Hypsosinga pygmaea</i>       | 1                              | 0.1           |     |
|  |                                | <i>Hypsosinga sanguinea</i>     | 1                              | 0.1           |     |
|  |                                | <i>Neoscona theisi</i>          | 1                              | 0.1           |     |
|  |                                | <i>Neoscona kunmingensis</i>    | 1                              | 0.1           |     |
|  | Thomisidae                     | <i>Xysticus ephippiatus</i>     | 95                             | 10.7          |     |
|  |                                | <i>Ebrechtella tricuspidata</i> | 3                              | 0.3           |     |
|  |                                | <i>Monaeses aciculus</i>        | 3                              | 0.3           |     |
|  |                                | <i>Xysticus croceus</i>         | 2                              | 0.2           |     |
|  |                                | <i>Xysticus hedinii</i>         | 2                              | 0.2           |     |
|  |                                | <i>Thomisus labefactus</i>      | 1                              | 0.1           |     |
|  |                                | <i>Xysticus cristatus</i>       | 1                              | 0.1           |     |
|  |                                | <i>Boliscus tuberculatus</i>    | 1                              | 0.1           |     |
|  |                                | <i>Oxytate hoshizuna</i>        | 1                              | 0.1           |     |
|  |                                | Clubionidae                     | <i>Clubiona deletrix</i>       | 33            | 3.7 |
|  | <i>Clubiona corrugata</i>      |                                 | 1                              | 0.1           |     |
|  | Tetragnathidae                 | <i>Tetragnatha squamata</i>     | 7                              | 0.8           |     |
|  |                                | <i>Pachygnatha tenera</i>       | 2                              | 0.2           |     |
|  | Gnaphosidae                    | <i>Zelotes asiaticus</i>        | 5                              | 0.6           |     |
|  |                                | <i>Zelotes tongdao</i>          | 2                              | 0.2           |     |

|       |              |                                 |     |     |
|-------|--------------|---------------------------------|-----|-----|
|       | Oxyopidae    | <i>Oxyopes sertatus</i>         | 26  | 2.9 |
|       |              | <i>Oxyopes javanus</i>          | 2   | 0.2 |
|       | Lycosidae    | <i>Pardosa sumatrana</i>        | 1   | 0.1 |
|       |              | <i>Pardosa laura</i>            | 1   | 0.1 |
|       | Linyphiidae  | <i>Allomengea adornata</i>      | 1   | 0.1 |
|       | Miturgidae   | <i>Prochora praticola</i>       | 1   | 0.1 |
|       | Titanoecidae | <i>Nurscia albofasciata</i>     | 1   | 0.1 |
|       | Agelenidae   | <i>Agelena labyrinthica</i>     | 1   | 0.1 |
|       | Trachelidae  | <i>Trachelas japonicus</i>      | 7   | 0.8 |
|       | Eutichuridae | <i>Cheiracanthium japonicum</i> | 2   | 0.2 |
| Total | 15           | 50                              | 885 |     |

**Table S2. Population dynamics of *E. vitis* and four dominant spider species in the canopies of tea.** Values presented as mean  $\pm$  SD (N = 3).

| Month     | Field-collected number (juvenile and adult) |                   |                       |                       |                         |
|-----------|---------------------------------------------|-------------------|-----------------------|-----------------------|-------------------------|
|           | <i>E. vitis</i>                             | <i>E. albaria</i> | <i>X. ephippiatus</i> | <i>M. pulcherrima</i> | <i>C. octomaculatum</i> |
| Jan. 2013 | 204.7 $\pm$ 23.7                            | 3.0 $\pm$ 1.0     | 0                     | 0                     | 3.3 $\pm$ 3.1           |
| Feb. 2013 | 184.3 $\pm$ 30.7                            | 5.0 $\pm$ 1.0     | 0                     | 2.7 $\pm$ 0.6         | 1.3 $\pm$ 2.3           |
| Mar. 2013 | 243.0 $\pm$ 53.5                            | 9.3 $\pm$ 2.5     | 3.3 $\pm$ 1.2         | 2.3 $\pm$ 0.6         | 16.0 $\pm$ 4.8          |
| Apr. 2013 | 370.0 $\pm$ 113.5                           | 11.7 $\pm$ 6.4    | 4.0 $\pm$ 1.0         | 1.3 $\pm$ 1.5         | 9.3 $\pm$ 5.5           |
| May 2013  | 684.0 $\pm$ 35.6                            | 18.0 $\pm$ 2.0    | 5.7 $\pm$ 0.6         | 4.7 $\pm$ 5.0         | 8.0 $\pm$ 7.1           |
| Jun. 2013 | 605.0 $\pm$ 118.2                           | 32.0 $\pm$ 12.0   | 9.0 $\pm$ 5.3         | 4.7 $\pm$ 1.2         | 3.3 $\pm$ 0.6           |
| Jul. 2013 | 488.3 $\pm$ 34.6                            | 61.7 $\pm$ 6.0    | 9.7 $\pm$ 4.7         | 10.0 $\pm$ 3.0        | 2.3 $\pm$ 0.6           |
| Aug. 2013 | 513.3 $\pm$ 168.0                           | 86.3 $\pm$ 11.9   | 8.7 $\pm$ 3.1         | 4.0 $\pm$ 3.6         | 1.0 $\pm$ 1.7           |
| Sep. 2012 | 664.7 $\pm$ 72.0                            | 45.3 $\pm$ 10.7   | 6.0 $\pm$ 2.0         | 4.0 $\pm$ 2.6         | 3.7 $\pm$ 2.1           |
| Oct. 2012 | 344.7 $\pm$ 191.1                           | 24.7 $\pm$ 6.7    | 9.7 $\pm$ 4.6         | 1.0 $\pm$ 1.7         | 3.7 $\pm$ 3.5           |
| Nov. 2012 | 193.7 $\pm$ 31.2                            | 10.3 $\pm$ 2.9    | 3.7 $\pm$ 1.2         | 2.0 $\pm$ 2.6         | 1.3 $\pm$ 2.3           |
| Dec. 2012 | 149.7 $\pm$ 29.3                            | 7.0 $\pm$ 1.7     | 0                     | 1.3 $\pm$ 1.5         | 3.3 $\pm$ 5.8           |

**Table S3. Effect of background DNA of predators on detection of *E. vitis*.** Values presented as mean  $\pm$  SD. CV stands for coefficients of variation. Exp1, the genomic DNA dissolved in ultra-pure water; Exp2, the genomic DNA dissolved in the genomic DNA mixture of four dominant spider species.

| Dilution of genomic DNA of <i>E. vitis</i> | Exp 1            |        | Exp 2            |        | Inter-assay (between Exp1 and Exp2) |        |
|--------------------------------------------|------------------|--------|------------------|--------|-------------------------------------|--------|
|                                            | Ct               | CV (%) | Ct               | CV (%) | Ct                                  | CV (%) |
| 1/10                                       | 24.34 $\pm$ 0.42 | 1.74   | 24.08 $\pm$ 0.18 | 0.74   | 24.21 $\pm$ 0.19                    | 0.78   |
| 1/100                                      | 27.17 $\pm$ 0.34 | 1.25   | 26.81 $\pm$ 0.41 | 1.51   | 26.99 $\pm$ 0.26                    | 0.95   |
| 1/1000                                     | 29.75 $\pm$ 0.46 | 1.55   | 29.68 $\pm$ 0.14 | 0.46   | 29.71 $\pm$ 0.05                    | 0.17   |
| 1/10000                                    | 32.93 $\pm$ 0.34 | 1.04   | 33.39 $\pm$ 1.33 | 3.98   | 33.16 $\pm$ 0.32                    | 0.98   |

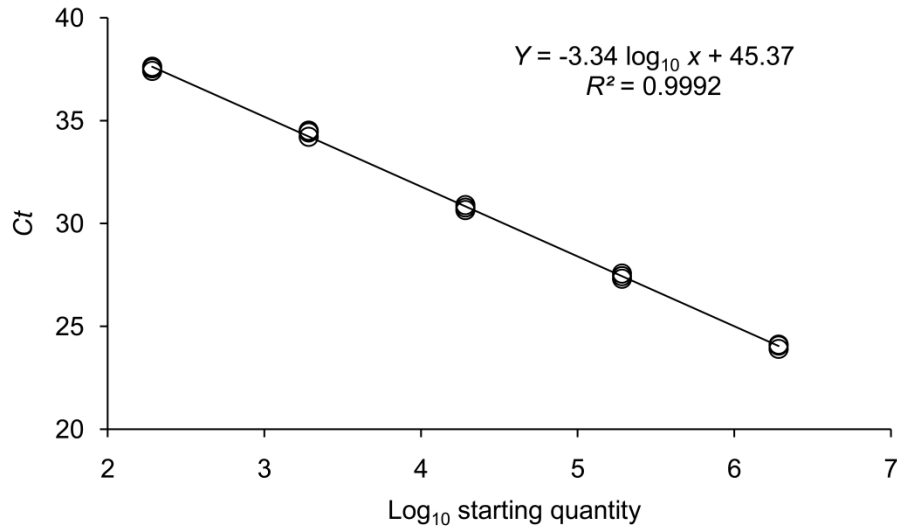

**Figure S1. A RQ-PCR standard curve for using stock plasmids of *E. vitis*.** *Ct* stands for RQ-PCR cycle number where fluorescence curve crosses threshold line. Each concentration was used in triplicates. The curve was linear over the range of concentrations used ( $1.92 \times 10^2$ – $1.92 \times 10^6$  copies/ $\mu$ L). The amplification efficiency was 97.6%.

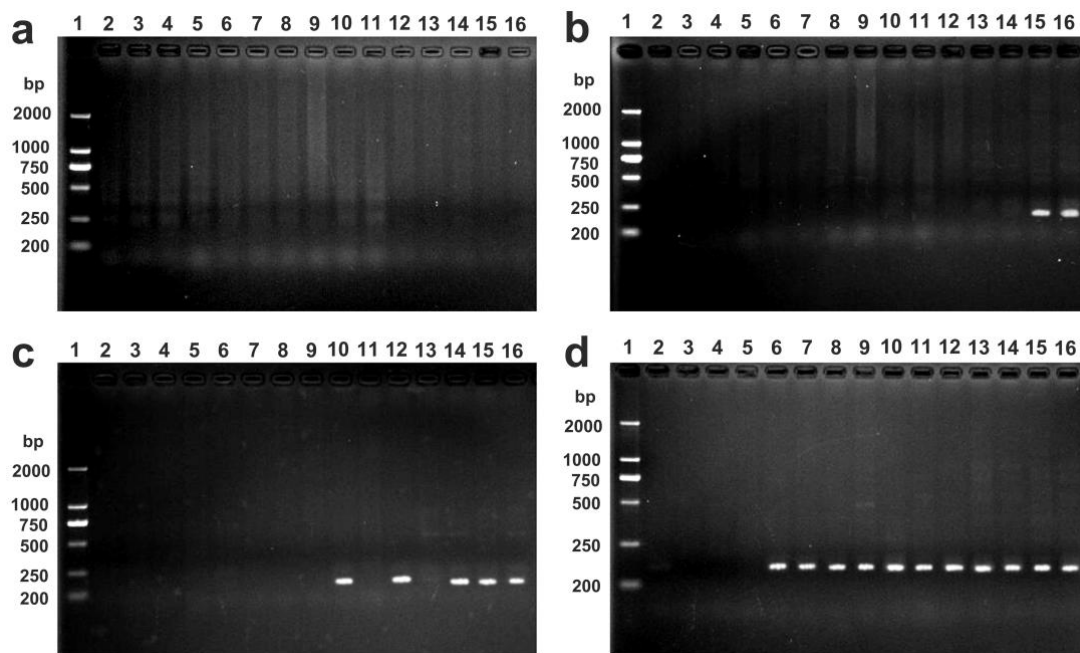

**Figure S2. Agarose gel electrophoresis of PCR amplified DNA of field-collected individual spiders with various dilution.** Cropped gels are merged and displayed (the full-length of each uncropped gel is 11.5 cm). a: Non-diluted DNA sample; b: Diluted by 3-fold with elution buffer; c: Diluted by 6-fold with elution buffer; d: Diluted by 9-fold with elution buffer. Lanes 1: DNA marker; Lanes 2–16: adult *E. albaria* from field collection.
